# 1 Metabolic trade-offs hide unforeseen benefits of plasmids carriage

2 Rafael C. Reding<sup>1</sup>.

3 <sup>1</sup> Living Systems Institute, University of Exeter, Exeter EX4 4QD, UK.

4 **Corresponding author:** R.C.Reding-Roman@exeter.ac.uk.

5 Microbes can preserve plasmids in non-selective conditions, paying a metabolic  
6 cost—reduced growth rate—without getting any benefit from them. Explaining  
7 this paradox is challenging. Here I report that plasmids can change multiple traits  
8 simultaneously, making them unexpectedly beneficial. A competition between two  
9 identical *Escherichia coli* strains, S and R, where R bears a non-transmissible plas-  
10 mid with a tetracycline-resistance gene, revealed that growth rate, biomass yield and  
11 lag are sensitive to plasmid carriage. Importantly these traits engaged in a trade-off  
12 that was previously unknown. R cells exploited it to preserve their plasmid and  
13 outgrow their plasmid-free counterpart S—with and without tetracycline. Most of  
14 the known plasmids are not transmissible, but they can replicate within their host.  
15 The above trade-off can explain the abundance of these plasmids in nature despite  
16 lacking horizontal transfer mechanisms.

## 17 Introduction

18 The ‘plasmid paradox’ (1) is founded on the seemingly contradictory abundance of plasmids  
19 among microbial communities. Plasmids are independent genetic elements that complement the  
20 chromosome of prokaryotes (1, 2) and eukaryotes (3) alike. They can benefit cells harbouring  
21 them—notoriously in the form of resistance to antibiotics—but the metabolic costs associated  
22 with their upkeep reduce the host’s growth rate (1, 4). Clinicians and evolutionary biologists  
23 exploit the sensitivity of growth rate to plasmid carriage, using pairwise competition experiments  
24 to estimate the costs of plasmid maintenance (5–9). Their conclusion is straightforward: mi-  
25 crobes without plasmids multiply faster in environments where plasmids are not beneficial, and  
26 overthrow microbes harbouring them (4, 8). Bacteria, however, can preserve plasmids that have  
27 no evident benefit (10–12). Whence the paradox.

28 Some plasmids can spread horizontally (i.e. conjugation) and escape this paradox (13), the  
29 problem is that most of the known plasmids are unable to do just that (14). The metabolic  
30 alterations that plasmids introduce in their hosts are unclear (5, 15–17), so I asked whether  
31 growth rate is the only life-history trait sensitive to plasmid carriage. It is not. I analysed the  
32 growth dynamics of two identical constructs (18) of *Escherichia coli*, one of which (R in the  
33 remainder) harbours a non-transmissible plasmid with a tetracycline resistance gene, and found  
34 that plasmids can also delay the onset of growth (lag) and increment biomass yield. Importantly,  
35 growth rate, lag, and yield engaged in a trade-off that was previously unknown.

36 Without tetracycline R exploited the trade-off in pairwise competition experiments that  
37 favoured yield over growth rate, preserving the plasmid while outgrowing S for 80< genera-

38 tions. During that time R maintained the plasmid without variations in the number of copies,  
39 but with tetracycline this number changed. Despite using concentrations below 2% the minimum  
40 inhibitory concentration, to allow the growth of the construct S, R-cells exposed to more antibi-  
41 otic hosted more plasmids. The gain was detectable within 24h, and exposed the dependence  
42 of the aforementioned benefits on plasmid copy number. Mutants harbouring more plasmids  
43 had lower yields and shorter lags, consistently with the above trade-off, but their growth rate  
44 remained unchanged. This suggests that growth rate assumes the costs of plasmid acquisition,  
45 whereas other traits—yield and lag—assume those of hosting different copies. Thus, plasmids  
46 can be either costly or beneficial depending on which trait is under selective pressure.

## 47 Results

48 **Plasmid-mediated trade-off between rate, yield and lag.** Growth curves can provide  
49 insight into metabolic changes in bacteria. The transition from efficient to inefficient pathways,  
50 for example, can be detected analysing them (19, 20). I therefore sought changes in the growth  
51 curves (see Methods) of two strains of *Escherichia coli* MC4100, one of which, R, bears the  
52 plasmid pGW155B (18). This plasmid contains a tetracycline resistance gene, *tet(36)*, and is  
53 non-transmissible, that is, it cannot be transferred horizontally to other cells. Now, the growth  
54 curves showed that harbouring pGW155B penalised the growth rate of R by  $29.41\% \pm 2.57\%$   
55 (mean  $\pm$  standard error, Mann-Whitney U-test  $p < 0.001$ ) compared to its sensitive counterpart,  
56 S, as we may expect (Figure 1A). But they also exposed noteworthy differences in other growth  
57 parameters.

58 Despite their lower growth rate, cells harbouring pGW155B attained larger population sizes  
59 than cells without it. I used this parameter to estimate the biomass yield ( $y$ ) of both strains, a  
60 proxy for metabolic efficiency (20) defined as  $y = K/glc$ , where  $K$  is the population size in the  
61 equilibrium or *carrying capacity* and  $glc$  the supply of glucose. This metric suggests that R cells,  
62 despite their slower growth rate, were the most efficient of both types (Mann-Whitney U-test for  
63 differences in carrying capacity  $p \approx 0.021$ , Figures 1B and C). Another parameter that I found  
64 sensitive to pGW155B was the lag phase—the period where cells negotiate their transition into  
65 growth—and its duration was considerably longer in R cells (Figure 1B, Mann-Whitney U-test  
66  $p < 0.001$ ). In other words, growth rate, yield and lag engage in a trade-off that was previously  
67 unknown and that, in our experimental setting, is triggered by the acquisition of pGW155B.

68 **Rate-yield-lag (RYL) trade-off changes the interpretation of carriage costs.** Now,  
69 clinicians and evolutionary biologists measure drug sensitivity using different traits. The former  
70 frequently measure changes in bacterial density across a range of antibiotic concentrations (21–  
71 24), whereas the latter measure changes in growth rate (7, 9, 25). I therefore asked how  
72 the above trade-off influence the interpretation of antibiotic sensitivity tests, and exposed the  
73 strains S and R to a range of tetracycline concentrations to measure the minimum inhibitory  
74 concentration (MIC)—a metric of drug sensitivity commonly used in drug therapy design (26,  
75 27). The plasmid borne by R increased its resistance to tetracycline by  $\sim 3,000\%$  irrespectively

76 of the trait I measured (Mann-Whitney U-test  $p = 0.083$ , ranksum = 55), but the MIC reported  
77 was, indeed, different for each trait (Figures 2A and S1A). Using growth rate data, the minimum  
78 inhibitory concentration for R was  $8.343 \pm 0.288$   $\mu\text{g}/\text{mL}$  of tetracycline (mean  $\pm$  95% confidence,  
79 Figure 2A), whereas using bacterial density data the MIC was  $6.106 \pm 0.272$   $\mu\text{g}/\text{mL}$  (Figure S1A).  
80 That is a  $\sim 35\%$  difference in the estimation of the same parameter. I found a similar gap for  
81 the tetracycline-sensitive strain S.

82 Importantly, whether pGW155B incurs in metabolic costs depends on which trait I measured.  
83 Growth rate and lag data suggests the plasmid is, indeed, costly to maintain (Figures 2A and  
84 S1B) but culture density data shows the opposite: harbouring pGW155B provides a benefit  
85 that helped R cells reach larger population sizes than their plasmid-free counterpart (Figures  
86 S1A). The trade-off between growth rate, yield and lag, triggered by pGW155B, explains this  
87 discrepancy.

88 **Plasmid maintenance depends on the trait under selection.** Growth rate is often used in  
89 microbiology as a proxy for microbial fitness (1, 8, 9) and, as I showed in Figure 1B, harbouring  
90 pGW155B imposed a reduction in growth rate in the construct R. Prior literature (8) showed  
91 that costly plasmids are purged from bacterial populations at an exponential rate very rapidly, so  
92 it is reasonable to assume that the construct S—without pGW155B—will outgrow R in sustained  
93 pairwise competitions. But given the RYL trade-off, it is no longer trivial to estimate the costs  
94 and consequences of plasmid carriage.

95 I tracked the growth rate of each construct grown in mixed cultures, with a 1:1 proportion,  
96 that were exposed to a range of tetracycline concentrations for five consecutive 24h seasons.  
97 Importantly I propagated the cultures once R reached the equilibrium (see Methods), thus,  
98 favouring yield over growth rate. Without antibiotic, the difference in growth rate between both  
99 constructs was negligible throughout the 5-day competition (Kruskal-Wallis H-test  $p = 0.7840$ ,  
100  $\chi^2$ -statistic = 1.7368, Figure 2A). Growth data, however, shows that R outgrew S in every  
101 season (Figure 2B). This had unforeseen consequences.

102 The mutant selection window (7) is a theoretical framework to estimate drug concentration  
103 that are likely to select for drug-resistant mutants. Crucially, it relies on costs of resistance  
104 imposed by either chromosomal mutations or plasmids that protect against antimicrobials that,  
105 analog to those of plasmid carriage, reduce the growth rate of emerging resistant microbes.  
106 A key parameter of this framework is the minimal selective concentration or MSC (7). This  
107 concentration defines an boundary whereby resistant mutants have higher growth rates than their  
108 sensitive counterparts—inhibited by the drug—above the MSC, whereas below this concentration  
109 sensitive cells are the ones with higher growth rates. In other words, drug concentrations above  
110 the MSC select for resistant mutants whereas lower concentrations select for sensitive cells (7).  
111 Now, I estimated the MSC at  $0.052 \pm 0.004$   $\mu\text{g}/\text{mL}$  of tetracycline (Figure 2C). The MSC  
112 remained unchanged in mixed culture conditions (Kruskal-Wallis H-test  $p \sim 0.1$ ,  $\chi^2$ -statistic  
113 = 7.6860, Figure 2D) but, as Figure 2A showed, there is no clear selection for neither construct.

114 Given the above RYL trade-off I failed to detect MSCs using growth data. The selection  
115 coefficient (28) shows there was, indeed, selection for the strain R (Figure 2D) that is not

116 captured by metrics that rely on growth rate. Thus, as Figure 2B illustrates, the construct R—  
117 with pGW155B—can sustainably outgrow S—without pGW155B—despite growing at a slower  
118 rates, with and without antibiotic.

119 **R-mutants with additional copies of pGW155B show phenotypic changes consistent**  
120 **with the RYL trade-off.** During the 5-day competition the growth rate of R did not change,  
121 as we may expect given the low tetracycline concentrations I used (Welsch's  $t$ -test,  $t$ -statistic  
122 = 1.309,  $p \approx 0.195$ , and slope 95% confidence interval = (-0.178, 0.853), Figure 3A). However,  
123 the selection coefficient for this construct was positive. Further analysis of the 5-day phenotypic  
124 dataset revealed changes in lag and yield that are consistent with the RYL trade-off, namely, a  
125 reduction in lag is followed by a reduction in biomass yield (Figure 3B and C). Crucially, R cells  
126 exposed to more tetracycline showed lower yield and shorter lag, so I asked whether the number  
127 of plasmid borne by R cells changed through time. And it did.

128 To quantify the relative abundance of pGW155B within R cells, I sampled the mixed cultures  
129 on days one and five, calculated the proportion of chromosomal DNA corresponding to the  
130 construct R, and used quantitative polymerase chain reaction (qPCR) to measure the number of  
131 plasmids borne per cell (see Methods). The initial pool of cells from this strain, grown overnight  
132 and used to inoculate the cultures, contained  $30.21 \pm 6.72$  copies of pGW155B per cell (mean  $\pm$   
133 95% confidence). Without tetracycline, this number did not change significantly after one and  
134 five days of competition against S (Mann-Whitney U-test  $p = 0.1$ , ranksum = 15, Figure 3D).  
135 But the relative abundance of pGW155B changed rapidly with increasing drug concentrations.  
136 Within 24h the gain in plasmids was 2-fold, increasing 6- to 10-fold after five days of competition  
137 depending on tetracycline concentration (Figures 3E and F). Note that the highest concentration  
138 I used, 0.14  $\mu$ g/mL, represents  $\sim 1\%$  the minimum inhibitory concentration for the construct  
139 R (see Methods).

140 To understand the relationship between plasmid copy number and drug concentration I fitted  
141 two mathematical models to qPCR data. First the linear model  $p_c = p_0 + d\kappa$  and then the  
142 constant model  $p_c = \kappa$ , where  $\kappa$  denotes the slope or proportionality constant,  $p_0$  the initial  
143 number of copies borne by each R cell and  $d$  the antibiotic supplied. The constant model, that  
144 assumes no change in the number of plasmids borne per cell, was extremely unlikely (relative  
145 likelihood  $\approx 6.80 \times 10^{-42}$ , Figure 3B). Instead the linear model suggests that plasmid copy number  
146 correlates with drug concentration, where the constant of proportionality  $\kappa = 161.87 \pm 110.37$   
147 plasmids per mL per microgram of drug per cell ( $t$ -statistic = 2.8745,  $p = 0.0088$  and 95%  
148 confidence interval (51.5, 272.2)). Albeit significant, with an adjusted coefficient of determination  
149 ( $R^2$ ) of 0.245, the linear model does not entirely capture the dynamics of qPCR data. A switch-  
150 like, non-linear model, say, the logistic model (see Methods), explained better the variation in  
151 the number of pGW155B that I observed (adjusted  $R^2$  of 0.477). After five days of exposure to  
152 tetracycline the constant  $\kappa$  increased from  $161.87 \pm 110.37$  to  $880.19 \pm 705.71$  plasmids per mL  
153 per microgram of drug per cell (Figure 3C,  $t$ -statistic = 2.4446,  $p = 0.0229$ , and 95% confidence  
154 interval (174.5, 1585.9)). The predictive power declined for the logistic model, albeit it was still  
155 better than that for the linear model (adjusted  $R^2 = 0.394$  versus 0.261).

## 156 Discussion

157 Plasmids are often portrayed as molecular parasites (6, 29) that must *jump* between hosts to  
158 persist within a population or else, face extinction (14, 30, 31). Non-transmissible plasmids are  
159 an evolutionary anomaly that should not exist—specially if they transport genes that bear no  
160 benefit to their hosts. And yet, they represent the most common type of plasmid (14). The  
161 RYL trade-off helps explain their existence given that merely hosting a plasmid can be beneficial  
162 and, complementing prior research (13) on transmissible plasmids, explain the ‘plasmid paradox’.  
163 Which begs the question whether it was a paradox to begin with. Growth rate is used extensively  
164 as the sole predictor for plasmid carriage but, it turns out, it is not the only trait that changes  
165 by hosting plasmids. If all the traits sensitive to plasmid carriage pay a cost, then growth rate  
166 may well be a good predictor of plasmid maintenance. As good as any of the other traits.  
167 However, if they do not, and all or some of the traits engage in a trade-off, then predicting  
168 plasmid maintenance may not be as trivial.

169 My study also suggests that plasmids can be highly sensitive to selection, given the sharp in-  
170 crease in the number of pGW155B borne by the construct R. Plasmid DNA can be substantially  
171 higher than chromosomal DNA in bacteria (32), and its relative abundance can change within  
172 the body during infections (33). It is therefore surprising that international AMR surveillance  
173 programmes (34) track only whether pathogens harbour plasmids. This has practical implica-  
174 tions. For example, the curation of plasmids from bacteria *in vivo* is gaining momentum as  
175 an alternative to treat drug-resistant infections (35–38). But the technique is still inefficient.  
176 It should be self-evident that pathogens carrying fewer plasmids will be easier to treat than  
177 those bearing more copies of them, but the variations in the number of plasmids borne is often  
178 overlooked. Equally, in the case of antimicrobial resistance, microbes hosting more plasmids  
179 with antimicrobial-resistance genes should be less sensitive to antibiotics than those harbouring  
180 fewer plasmids. The plasmid might well be the same, just in different number. Reporting this  
181 information will be an asset in our fight against antimicrobial-resistant microbes.

## 182 Methods

183 **Media and Strains.** I used the strains of *Escherichia coli* GB(c) and Wyl (39) (a gift from  
184 Remy Chait and Roy Kishony), and M9 minimal media supplemented with 0.4% glucose and 0.1%  
185 casamino acids. I made tetracycline stock solutions from powder stock (Duchefa #0150.0025) at  
186 5mg/mL in deionised water. Subsequent dilutions were made from this stock and kept at 4°C.

187 **Batch transfer protocol.** I inoculated a 96-well microtitre plate containing 150µg/mL of  
188 media supplemented with tetracycline with a mixture of two overnight cultures, one of *E. coli*  
189 GB(c) and another of *E. coli* Wyl. The overnight culture for GB(c) was supplemented with  
190 100ng/mL of tetracycline to preserve the plasmid pGW155B carrying *tet(36)* (39), and inocu-  
191 lated the microtitre plate with a mixture of the aforementioned overnight cultures, using different  
192 volumes so that the proportion between GB(c) and Wyl was 1:1 (Figure S2). I incubated the  
193 microtitre plate at 30°C in a commercial spectrophotometer and measured the optical density

194 of each well at 600nm ( $OD_{600}$ ), yellow fluorescence for the S strain (YFP excitation at 505nm,  
195 emission at 540nm), and cyan fluorescence for the R strain (CFP at 430nm/480nm) every 20min  
196 for 24h (a.k.a. *season*). After each season I transferred 1.5 $\mu$ L of each well, using a 96-well pin  
197 replicator, into a new microtitre plate containing fresh growth medium and tetracycline.

198 **Growth parameter estimation.** Fluorescence protein genes were constitutively expressed  
199 with an approximately constant fluorescence to optical density ratio (Figure S3). This enabled  
200 me to use fluorescence as a proxy for culture density in mixed culture conditions. I normalised  
201 fluorescence readings with respect to optical density readings using the ratio optical density to  
202 fluorescence in pure culture conditions as a reference.

203 I imported the resulting OD time series data set (Figures S4 and S5) into MATLAB R2014b  
204 to subtract background and calculate growth rate *per capita* (fitness,  $f$ ) using the following  
205 algorithm. First, I fitted three mathematical models to data: 1) linear model  $g(t) = b + f \cdot t$ , 2)  
206 exponential model  $g(t) = b + C \cdot \exp(f \cdot t)$  and 3) logistic model  $g(t) = b + K / (1 + C \cdot \exp(-f \cdot t))$ .  
207 The terms  $g(t)$  denote culture growth through time (in OD, YFP, or CFP units),  $b$  the inoculum  
208 size used to subtract the background,  $C$  is a parameter and  $K$  the maximal population size  
209 attained. I used the fitness reported by the model with the lowest corrected Akaike Information  
210 Criterion (AICc).

211 Finally, I calculated the selection coefficient for the plasmid-harbouring strain using the  
212 regression model (28)  $s = \ln[R(t)/R(0)] \cdot t^{-1}$ , where  $R(0)$  is the initial ratio of resistant to  
213 susceptible (1:1) and  $R(t)$  the ratio at time  $t$ .

214 **Drug sensitivity parameter estimation.** I defined the minimum inhibitory concentration  
215 (MIC) for each trait as the tetracycline required to reduce the trait of the bacterium by a factor  
216 of 99%, compared to the tetracycline-free control. The MICs were  $0.364 \pm 0.012$  (mean  $\pm$  95%  
217 confidence),  $0.351 \pm 0.013$  and  $0.451 \pm 0.019$   $\mu$ g/mL of tetracycline for the strain S using culture  
218 density, growth rate, and Malthusian growth respectively. For the strain R they were  $11.121 \pm$   
219  $1.734$ ,  $9.103 \pm 0.379$ , and  $4.282 \pm 0.038$   $\mu$ g/mL. Given the suppression of S in competition  
220 (Figure S6), I failed to detect its MICs in these conditions. I therefore relaxed the degree of  
221 inhibition from 99% to 90% ( $IC_{90}$ ) to allow the estimation of drug sensitivity parameters in  
222 competition.

223 **DNA material extraction.** For each concentration, I sampled three representative 150 $\mu$ g/mL  
224 cultures that I divided into two groups for chromosome and plasmid DNA extraction. I Ther-  
225 moScientific GeneJet DNA (#K0729) and GeneJet Plasmid (#K0502) extraction kits to extract  
226 chromosome and plasmid DNA from the samples, respectively, and used Qubit to quantify the  
227 yields. Both extracts were diluted accordingly in extraction buffer to normalise DNA across  
228 samples.

229 **Quantitative PCR and plasmid copy number estimation.** I used primer3 to design two  
230 pairs of primers with melting temperature ( $T_m$ ) of 60°C and non-overlapping probes with  $T_m$

231 of 70°C. The amplicon ranges between 100 to 141bp depending on the locus (Table S1). Two  
232 reaction mixes were prepared using the kit ‘Luminaris Color Probe Low ROX’ (ThermoScientific  
233 #K0342), adding 0.3µM of each primer and 0.2µM of the probe as per manufacturer specifica-  
234 tions. Following a calibration curve for each reaction (Figure S7) I added 0.01ng of chromosomal  
235 or plasmid DNA material to each of the reaction mixes.

236 To estimate the relative copies of pGW155B per R cell, I calculated the corresponding pro-  
237 portion of chromosomal DNA corresponding to the R-type from data in Figure 2D and used the  
238 formula (8)

$$239 \quad cn = \frac{(1 + E_c)^{C_{tc}}}{(1 + E_p)^{C_{tp}}} \times \frac{S_c}{S_p},$$

240 where  $cn$  is the number of plasmid copies per chromosome,  $S_c$  and  $S_p$  are the size of the chromo-  
241 some and pGW155B amplicon in bp,  $E_c$  and  $E_p$  the efficiency of the qPCR taken from data in  
242 Figure S7, and  $C_{tc}$  and  $C_{tp}$  are the cycles at which I first detected product amplification ( $C_t$ ).

8

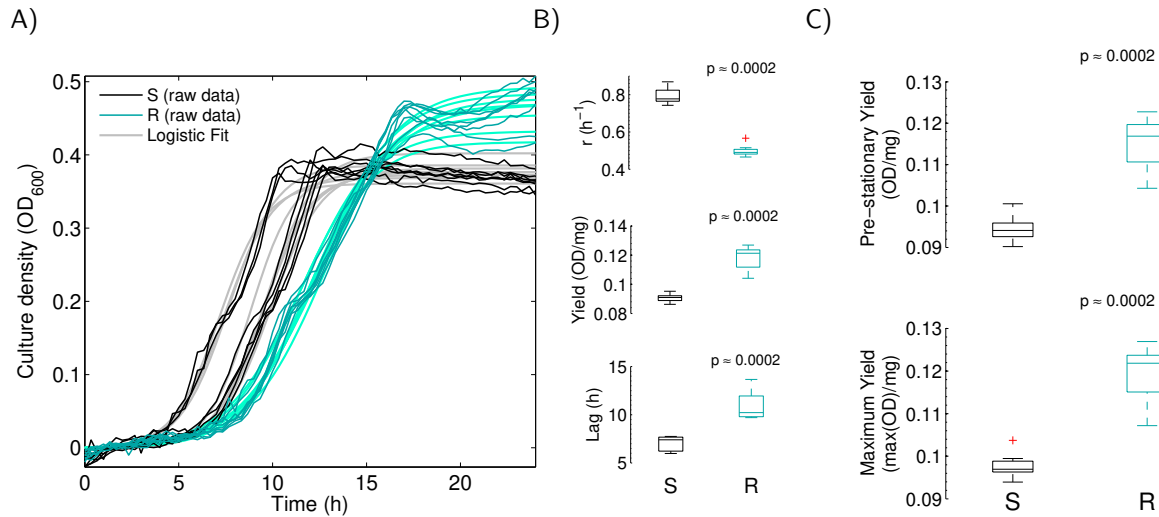

243 **FIGURE 1. Rate-yield-lag (RYL) trade-off in strain carrying pGW155B.** **A)** Overlapped growth  
244 curves of strains S (black) and R (cyan) in the absence of tetracycline. I estimated the growth rate ( $r$ ),  
245 population size in the equilibrium ( $K$ ), biomass yield (see main text), and lag from logistic models fitted  
246 to data (see Methods) shown in grey and light cyan, respectively. **B)** Box plots for each trait showing the  
247 median (centre of the box), 25th and 75th percentile of the data set. The whiskers extend to the most  
248 extreme data points that are not outliers, and these are individually represented. The  $p$  value shown on  
249 top of each box plot refers to a Mann-Whitney U-test that I used to test differences in the parameters  
250 between both strains. **C)** Alternative metrics for biomass yield (see Methods) using culture density at the  
251 onset of stationary phase (top) and maximal culture density at any given time. The  $p$  values correspond  
252 to Mann-Whitney U-tests.



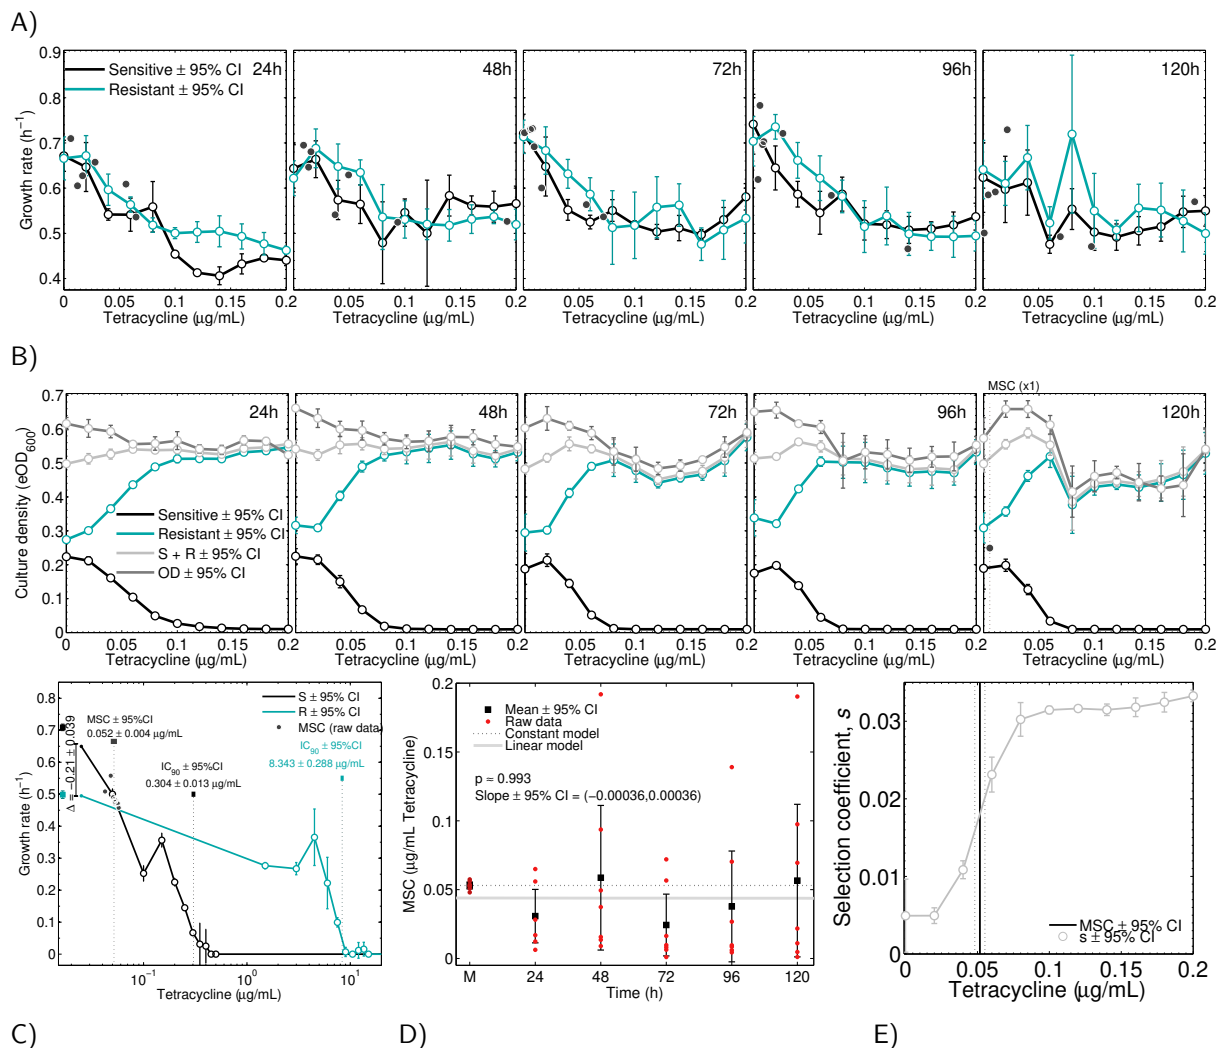

254 C) D) E)

255 **FIGURE 2. Growth rate alone is unable to capture plasmid maintenance.** **A)** Change in *per*  
256 *capita* growth rate during the 5-day pairwise competition showing both sensitive (S, black) and resistant  
257 (R, cyan) *Escherichia coli* strains. In each subplot I present the mean growth rate  $\pm$  95% confidence  
258 across all tetracycline concentration corresponding to five consecutive 24h seasons. The crossing point  
259 for each replicate—minimal selective concentration or MSC—is shown as small, black circles. **B)** Same  
260 as A), but I show change in cell density in optical density units derived from normalised fluorescence data  
261 (see Methods). In light grey I show the optical density of the mixed culture estimated from normalised  
262 fluorescence data, and in dark grey the optical density measured at 600nm **C)** Dose-response profile for  
263 each strain showing the change in growth rate with increasing tetracycline concentrations. I measured  
264 the costs of carrying pGW155B using growth rate from relative fluorescence growth data, with a decrease  
265 of  $0.21 \pm 0.039 \text{ h}^{-1}$  for R (mean  $\pm$  95% confidence). The profiles of both strains crossed-over with  
266  $0.052 \pm 0.004 \text{ } \mu\text{g/mL}$  of tetracycline, defining the *minimal selective concentration*. **D)** Change in MSC over  
267 time with respect that measured in monoculture (M). Mean and 95% confidence interval are shown as  
268 black errorbars and the raw data as red dots. I fitted this data set to a constant (dotted line) and linear  
269 (light grey) models, the *p* value and slope shown correspond to the linear model. **E)** Selection coefficient  
270 for the resistant strain, *s*, at different tetracycline concentrations. I also represented the MSC in C) and  
271 its 95% confidence interval as a reference.

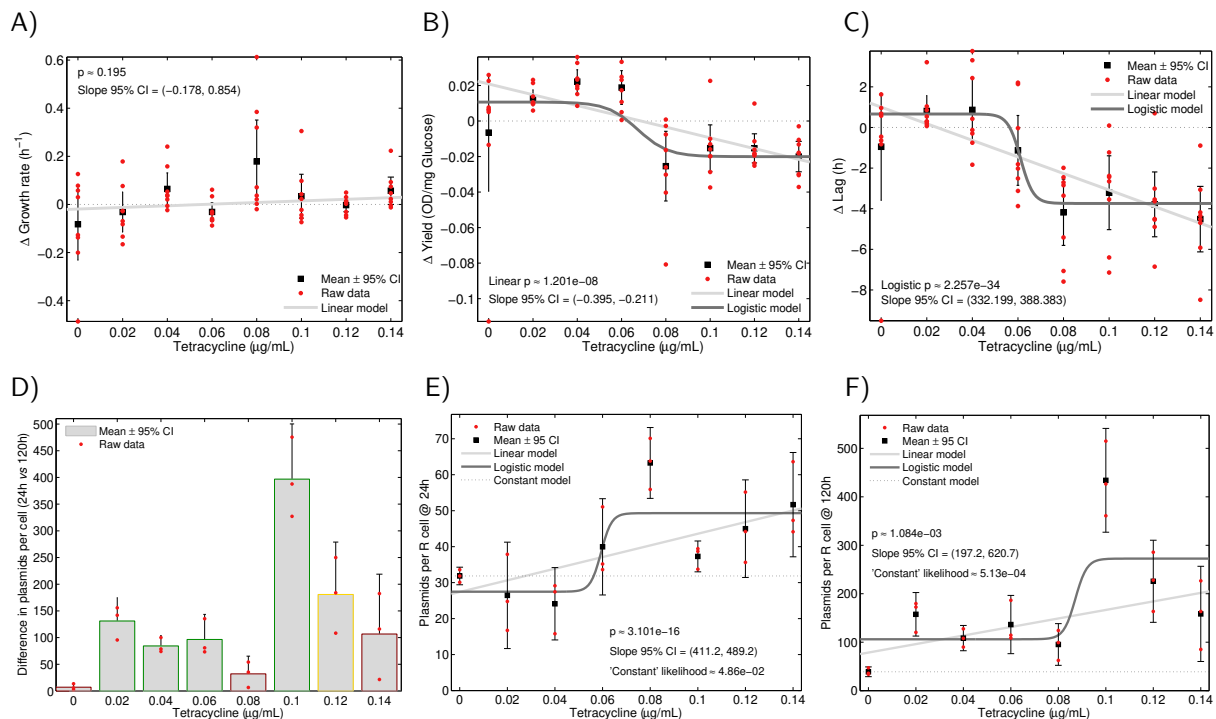

273 **FIGURE 3. Variations in plasmid copy number induce phenotypic changes that are consistent with the RYL trade-off.** A-C) Variation in growth rate (A), biomass yield (B), and lag (C)  
 274 after 120h exposure to different tetracycline concentrations. I show mean and 95% confidence interval as  
 275 black error bars and raw data in red dots. The dotted black line represents a constant model (a.k.a. no  
 276 change), light grey line represents a linear model, and dark grey a logistic model. The statistics shown in  
 277 A-C are those for the model with the highest adjusted coefficient of determination ( $R^2$ ). D) Increment in  
 279 pGW155B copy number after five days (120h) of exposure to tetracycline. Bars denote the mean and the  
 280 errorbar 95% confidence of the mean; those with a green edge have a significant increase in copy number  
 281 ( $p < 0.05$ ) according to Welch's  $t$ -test, red if it was not ( $p > 0.05$ ), and yellow if the test was inconclusive  
 282 ( $p \approx 0.05$ ). Raw difference in qPCR data is shown as red dots. E-F) Effect of tetracycline concentration  
 283 on the number of plasmids borne by R cells after 24h (E) and 120h (F) of exposure to tetracycline. I  
 284 show the mean and 95% confidence interval of qPCR data as black errorbars, and raw qPCR data as  
 285 red dots. The black dotted line represents the prediction from the constant model, in light grey that  
 286 for the linear model, and in dark grey the prediction for the logistic model. Statistical significance ( $p$ )  
 287 for the slope parameter and confidence interval is shown for the model with highest adjusted coefficient  
 288 of determination ( $R^2$ ), which was the logistic in both data sets: 0.245 versus 0.477 for 24h data (linear  
 289 versus logistic), and 0.261 versus 0.394 for 120h data. The likelihood function deemed the constant model  
 290 unlikely (probability of 0.0486 for 24h data, 0.0005 for 120h data), so I did not consider its  $R^2$ .

## 292 References

- 293 1. Harrison, E. & Brockhurst, M. A. Plasmid-mediated horizontal gene transfer is a coevol-  
294 utionary process. *Trends Microbiol.* **20**, 262–267 (2012).
- 295 2. Slater, F. R., Bailey, M. J., Tett, A. J. & Turner, S. L. Progress towards understanding the  
296 fate of plasmids in bacterial communities. *FEMS Microbiol. Ecol.* **66**, 3–13 (2008).
- 297 3. Esser, K., Kück, U., *et al.* *Plasmids of Eukaryotes: Fundamentals and Applications* ISBN:  
298 9783642825859 (Springer Berlin Heidelberg, 2012).
- 299 4. Starikova, I., Sørum, V., *et al.* Fitness costs of various mobile genetic elements in *En-*  
300 *terococcus faecium* and *Enterococcus faecalis*. *J. Antimicrob. Chemother.* **68**, 2755–2765  
301 (2013).
- 302 5. Rhee, J. I., Ricci, J. C. D., Bode, J. & Schügerl, K. Metabolic enhancement due to plasmid  
303 maintenance. *Biotechnol. Lett.* **16**, 881–884 (1994).
- 304 6. Bergstrom, C. T., Lipsitch, M. & Levin, B. R. Natural selection, infectious transfer and the  
305 existence conditions for bacterial plasmids. *Genetics* **155**, 1505–1519 (2000).
- 306 7. Gullberg, E., Cao, S., *et al.* Selection of resistant bacteria at very low antibiotic concentra-  
307 tions. *PLoS Pathog.* **7**, e1002158 (July 2011).
- 308 8. Millán, A. S., Peña-Miller, R., *et al.* Positive selection and compensatory adaptation interact  
309 to stabilize non-transmissible plasmids. *Nat. Commun.* **5** (2014).
- 310 9. Day, T., Huijben, S. & Read, A. F. Is selection relevant in the evolutionary emergence of  
311 drug resistance? *Trends Microbiol.* **23**, 126–133 (2015).
- 312 10. Sherratt, D. The Maintenance and Propagation of Plasmid Genes in Bacterial Populations  
313 The Sixth Fleming Lecture. *Microbiology* **128**, 655–661 (1982).
- 314 11. Byrd, J. J. & Colwell, R. R. Long-term survival and plasmid maintenance of *Escherichia*  
315 *coli* in marine microcosms. *FEMS Microbiol. Ecol.* **12**, 9–14 (1993).
- 316 12. Heuer, H., Krögerrecklenfort, E., *et al.* Gentamicin resistance genes in environmental bacte-  
317 ria: prevalence and transfer. *FEMS Microbiol. Ecol.* **42**, 289–302 (2002).
- 318 13. Lopatkin, A. J., Meredith, H. R., *et al.* Persistence and reversal of plasmid-mediated an-  
319 tibiotic resistance. *Nat. Commun.* **8**, 1689 (2017).
- 320 14. Smillie, C., Garcillán-Barcia, M. P., Francia, M. V., Rocha, E. P. & de la Cruz, F. Mobility  
321 of plasmids. *Microbiol. Mol. Biol. Rev.* **74**, 434–452 (2010).
- 322 15. Diaz Ricci, J. C. & Hernández, M. E. Plasmid effects on *Escherichia coli* metabolism. *Crit.*  
323 *Rev. Biotechnol.* **20**, 79–108 (2000).
- 324 16. Gonçalves, G. A., Bower, D. M., Prazeres, D. M., Monteiro, G. A. & Prather, K. L. Ra-  
325 tional engineering of *Escherichia coli* strains for plasmid biopharmaceutical manufacturing.  
326 *Biotechnol. J.* **7**, 251–261 (2012).

- 327 17. Baltrus, D. A. Exploring the costs of horizontal gene transfer. *Trends Ecol. Evol.* **28**, 489–  
328 495 (2013).
- 329 18. Chait, R., Shrestha, S., Shah, A. K., Michel, J.-B. & Kishony, R. A Differential Drug Screen  
330 for Compounds That Select Against Antibiotic Resistance. *PLoS One* **5**, e15179 (2010).
- 331 19. Scott, M., Klumpp, S., Mateescu, E. M. & Hwa, T. Emergence of robust growth laws from  
332 optimal regulation of ribosome synthesis. *Mol. Syst. Biol.* **10**, 747 (2014).
- 333 20. Reding-Roman, C., Hewlett, M., *et al.* The unconstrained evolution of fast and efficient  
334 antibiotic-resistant bacterial genomes. *Nat. Ecol. Evol.* **1**, 0050 (2017).
- 335 21. Andrews, J. M. Determination of minimum inhibitory concentrations. *J. Antimicrob. Chemother.*  
336 **48**, 5–16 (2001).
- 337 22. Drlica, K. & Zhao, X. Mutant selection window hypothesis updated. *Clin. Infect. Dis.* **44**,  
338 681–8 (Mar. 2007).
- 339 23. Andersson, D. I. & Hughes, D. Antibiotic resistance and its cost: is it possible to reverse  
340 resistance? *Nat. Revs. Microbiol.* **8**, 260–271 (2010).
- 341 24. Choi, J., Yoo, J., *et al.* A rapid antimicrobial susceptibility test based on single-cell mor-  
342 phological analysis. *Sci. Transl. Med.* **6**, 267ra174 (2014).
- 343 25. Rosenbloom, D. I., Hill, A. L., Rabi, S. A., Siliciano, R. F. & Nowak, M. A. Antiretroviral  
344 dynamics determines HIV evolution and predicts therapy outcome. *Nat. Med.* **18**, 1378–  
345 1385 (2012).
- 346 26. Finberg, R. W. & Guharoy, R. in *Clinical Use of Anti-infective Agents* 5–14 (Springer,  
347 2012).
- 348 27. Ajmal, S., Saleh, O. A. & Beam, E. Development of high-grade daptomycin resistance  
349 in a patient being treated for *Corynebacterium striatum* infection. *Antimicrob. Agents.*  
350 *Chemother.* **61** (2017).
- 351 28. Dykhuizen, D. E. Experimental Studies of Natural Selection in Bacteria. *Annu. Rev. Ecol.*  
352 *Syst.* **21**, 373–398 (1990).
- 353 29. Svara, F. & Rankin, D. J. The evolution of plasmid-carried antibiotic resistance. *BMC Evol.*  
354 *Biol.* **11**, 130 (2011).
- 355 30. Subbiah, M., Top, E. M., Shah, D. H. & Call, D. R. Selection pressure required for long-  
356 term persistence of bla CMY-2-positive IncA/C plasmids. *Appl. Environ. Microbiol.* **77**,  
357 4486–4493 (2011).
- 358 31. Carroll, A. C. & Wong, A. Plasmid persistence: costs, benefits, and the plasmid paradox.  
359 *Can. J. Microbiol.* **64**, 293–304 (2018).
- 360 32. Zhong, C., Peng, D., *et al.* Determination of plasmid copy number reveals the total plasmid  
361 DNA amount is greater than the chromosomal DNA amount in *Bacillus thuringiensis* YBT-  
362 1520. *PLoS One* **6**, e16025 (2011).

- 363 33. Wang, H., Avican, K., *et al.* Increased plasmid copy number is essential for *Yersinia* T3SS  
364 function and virulence. *Science* **353**, 492–495 (2016).
- 365 34. *European Centre for Disease Prevention and Control. EU protocol for harmonised monitor-*  
366 *ing of antimicrobial resistance in human Salmonella and Campylobacter isolates* tech. rep.  
367 (2016).
- 368 35. Baquero, F., Coque, T. M. & de la Cruz, F. Eco-Evo drugs and strategies: the need for novel  
369 tools to fight antibiotic resistance. *Antimicrob. Agents. Chemother.* AAC-00013 (2011).
- 370 36. Bikard, D., Euler, C. W., *et al.* Exploiting CRISPR-Cas nucleases to produce sequence-  
371 specific antimicrobials. *Nat. Biotech.* **32**, 1146 (2014).
- 372 37. Kamruzzaman, M., Shoma, S., Thomas, C. M., Partridge, S. R. & Iredell, J. R. Plasmid  
373 interference for curing antibiotic resistance plasmids in vivo. *PloS One* **12**, e0172913 (2017).
- 374 38. Buckner, M. M., Ciusa, M. L. & Piddock, L. J. Strategies to combat antimicrobial resistance:  
375 anti-plasmid and plasmid curing. *FEMS Microbiol. Rev.* **42**, 781–804 (2018).
- 376 39. Chait, R., Craney, A & Kishony, R. Antibiotic interactions that select against resistance.  
377 *Nature* **446**, 668–671 (2007).

378 **Acknowledgements:** I thank R. Beardmore for in-depth comments on the manuscript; and  
379 members of the Beardmore and Gudelj laboratories for comments. **Competing interests:** The  
380 author declares no competing interests.

381 **Supplementary Tables**

382 **TABLE S1.** Primers and probes designed using Primer3. Amplicon ranging from 100 to 141bp.  $T_m$   
 383 indicates the estimated melting temperature.

| Target gen     | Sequence (5' → 3')   | $T_m$ (°C) | Feature |
|----------------|----------------------|------------|---------|
| <i>tatB</i>    | CGATGAAGCGTTCCTACGTT | 60.27      | Forward |
|                | TCATGCGCAGCTTCATTATC | 59.94      | Reverse |
|                | AAGGCGAGCGATGAAGCGCA | 70.70      | Probe   |
| <i>tet(36)</i> | ATTGGGCATCTATTGGCTTG | 59.22      | Forward |
|                | CCGATTCACAGGCTTTCTTG | 60.76      | Reverse |
|                | AGCCTTTGCCAATTGGGGCG | 70.37      | Probe   |

386 **Supplementary Figures**

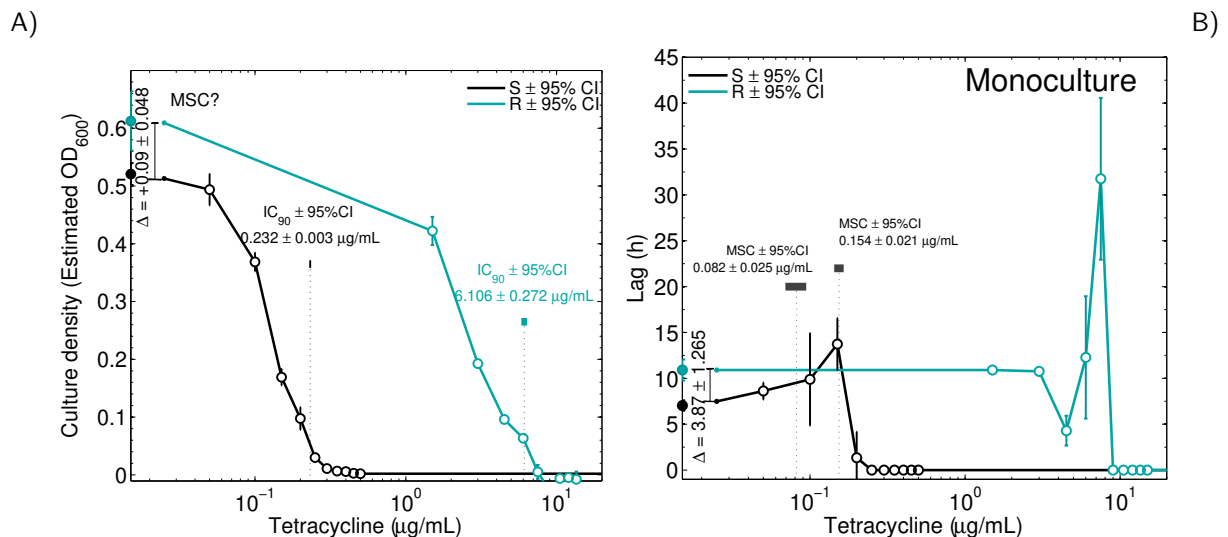

387 **FIGURE S1. Dose-response profile for tetracycline using culture density and lag data.** Dose-  
 388 response profiles for each strain showing the change in culture density (A) and lag (B) with increasing  
 389 tetracycline concentrations. The difference in R growth with respect to S was positive in antibiotic-free  
 390 conditions (mean ± 95% confidence). Consequently, I could not detect any tetracycline concentration at  
 391 which the profiles crossed over—*minimal selective concentration*—and establish the selection window for  
 392 S. I estimated culture density from fluorescence data normalised with respect to optical density data (see  
 393 Methods). In lag data, the difference between both types without tetracycline was negative and, thus, I  
 394 could detect two MSCs at 0,082 ± 0.025 and .0154 ± 0.021 µg/mL of tetracycline.

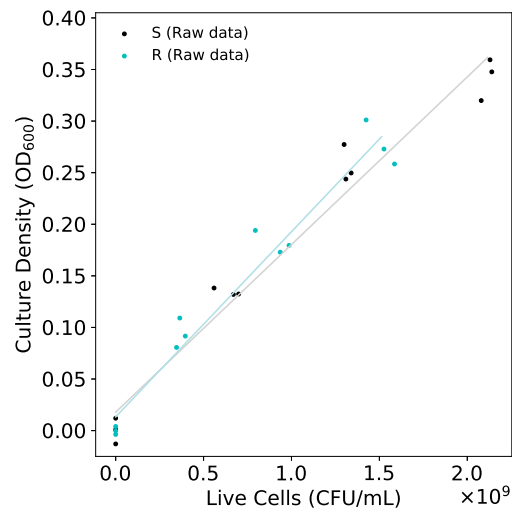

396 **FIGURE S2. Calibration curve to translate optical density data to number of *Escherichia***  
 397 ***coli* cells.** I fitted the linear model  $a = bx + c$  to optical density and colony counting data (dots) to  
 398 calculate the number of optical density units ( $OD_{600}$ ) per cell.  $a$  denotes the optical density readings  
 399 measured at 600nm,  $c$  the crossing point with the  $y$ -axis when  $x = 0$ , and  $b$  the conversion factor between  
 400 optical density and number of cells ( $x$ ). I interpolating optical density readings to calculate the number  
 401 of cells within a culture as  $x = (a - c)/b$ . For the strain S,  $b = 1.62 \times 10^{-10} OD \cdot mL \cdot CFU^{-1}$  and  
 402  $c = 1.78 \times 10^{-2} OD$ , whereas for R  $b = 1.79 \times 10^{-10} OD \cdot mL \cdot CFU^{-1}$  and  $c = 1.33 \times 10^{-2} OD$ .

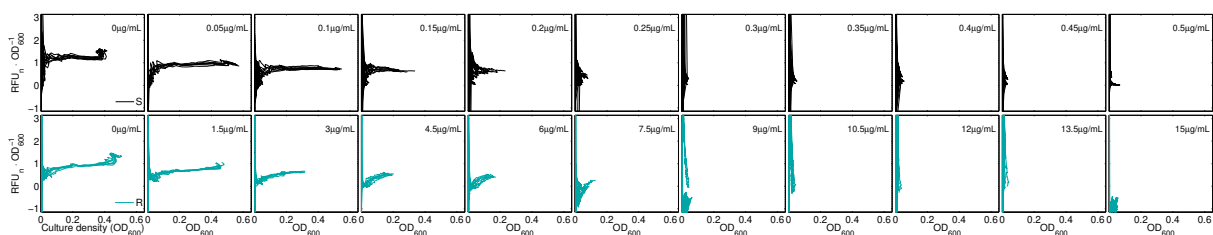

404 **FIGURE S3. Changes in relative fluorescence over time in both R and S strains.** Raw change  
 405 in fluorescence, per optical density units, measured every 20min for 24h for the S- (black) and R-type.  
 406 Each column represents the data set for each tetracycline concentration used.

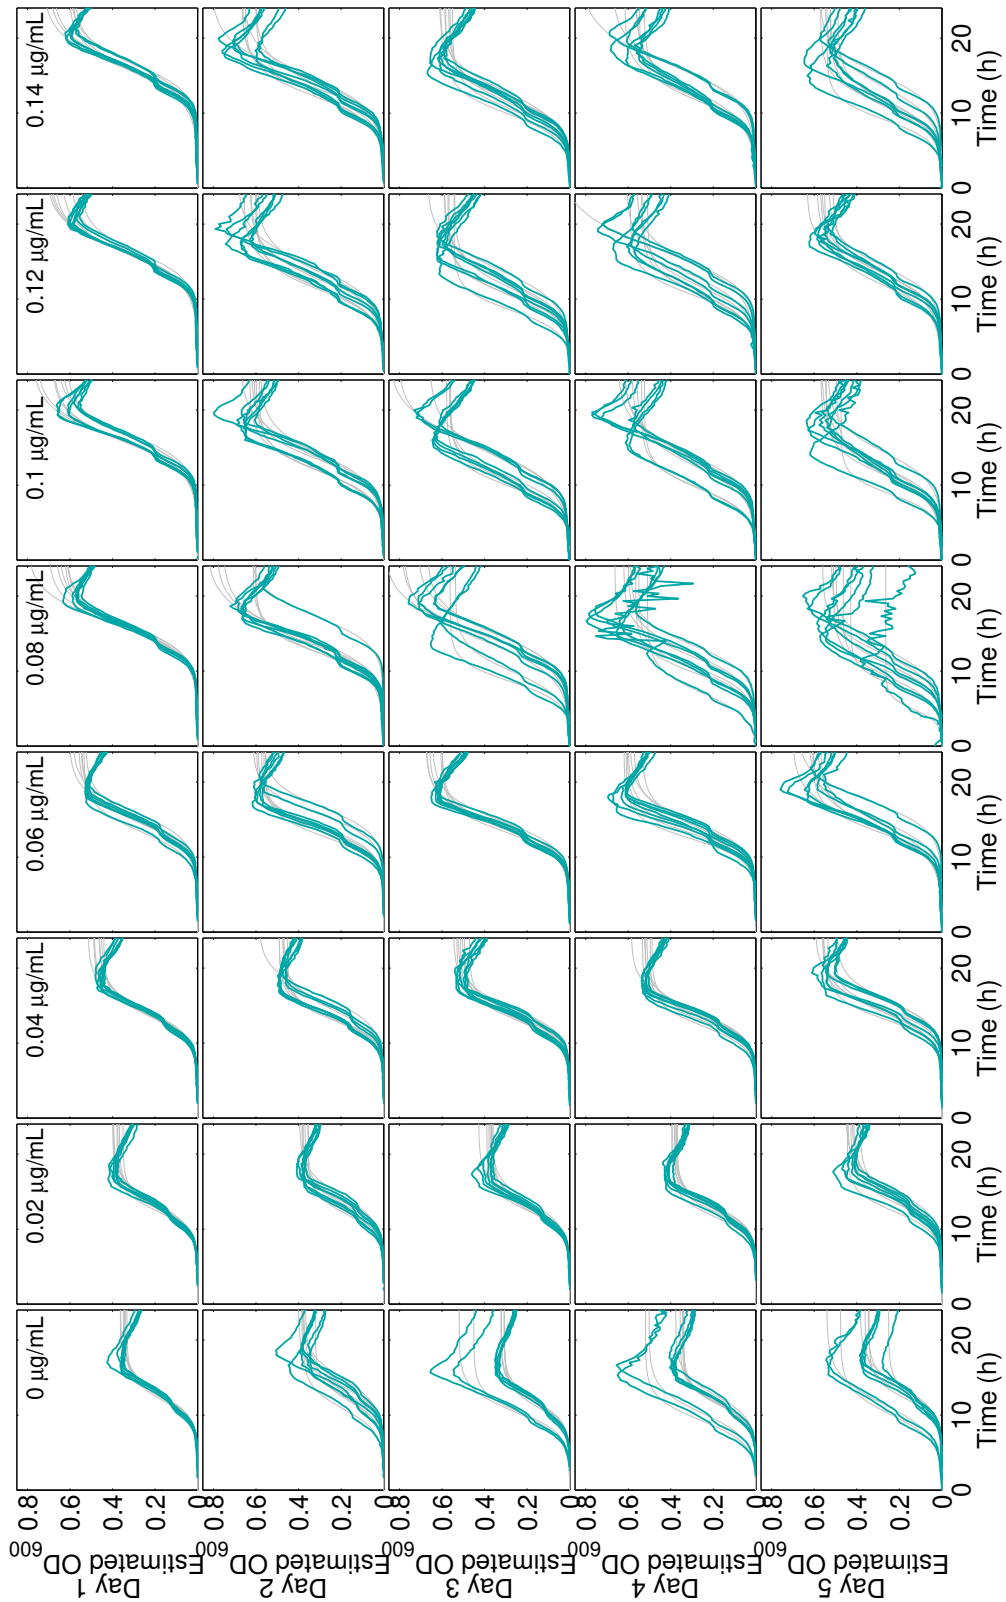

408 **FIGURE S4. Raw data and model fit for resistant R strain.** Raw optical Density data for GB(c)  
409 measured every 20min for five 24h seasons (blue). The best fit to data (see Methods in main text) used  
410 to calculate bacterial fitness is shown in grey. Each column represents the data set for one 24h season  
411 and each row the data set for one tetracycline concentration.



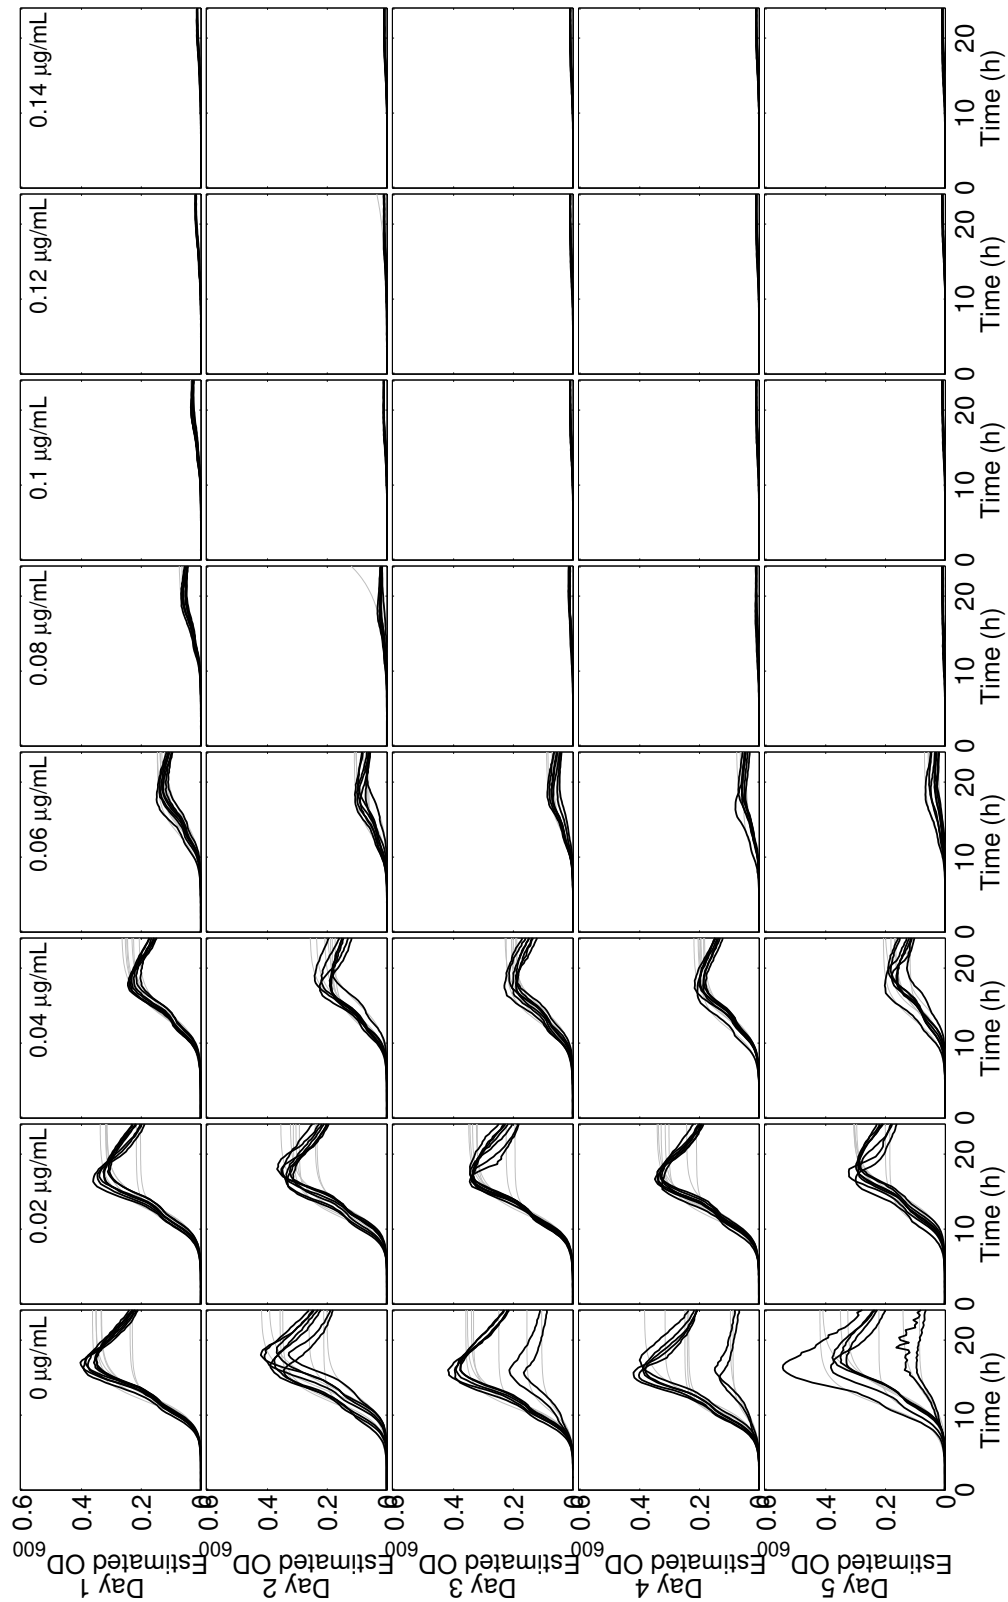

413 **FIGURE S5. Raw data and model fit for sensitive S strain.** Raw optical Density data for Wyl  
414 measured every 20min for five 24h seasons (black). The best fit to data (see Methods in main text) used  
415 to calculate bacterial fitness is shown in grey. Each column represents the data set for one 24h season  
416 and each row the data set for one tetracycline concentration.

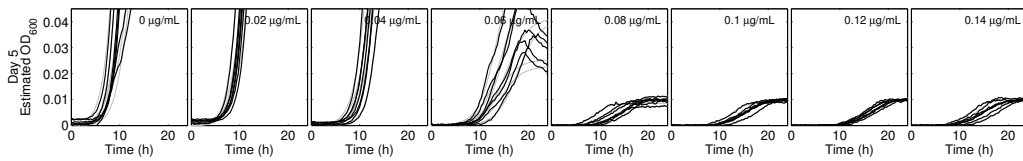

418 **FIGURE S6. Sensitive type not fully outcompeted during the competition.** Augmented detail  
 419 of the evolved dose-response profiles of the tetracycline sensitive strain S after five days of exposure to  
 420 tetracycline. Raw optical Density data measured every 20min for five 24h seasons (black). The best fit  
 421 to data (see Methods in main text) used to calculate bacterial fitness is shown in grey. Each column  
 422 represents the data set for one 24h season and each row the data set for one tetracycline concentration.

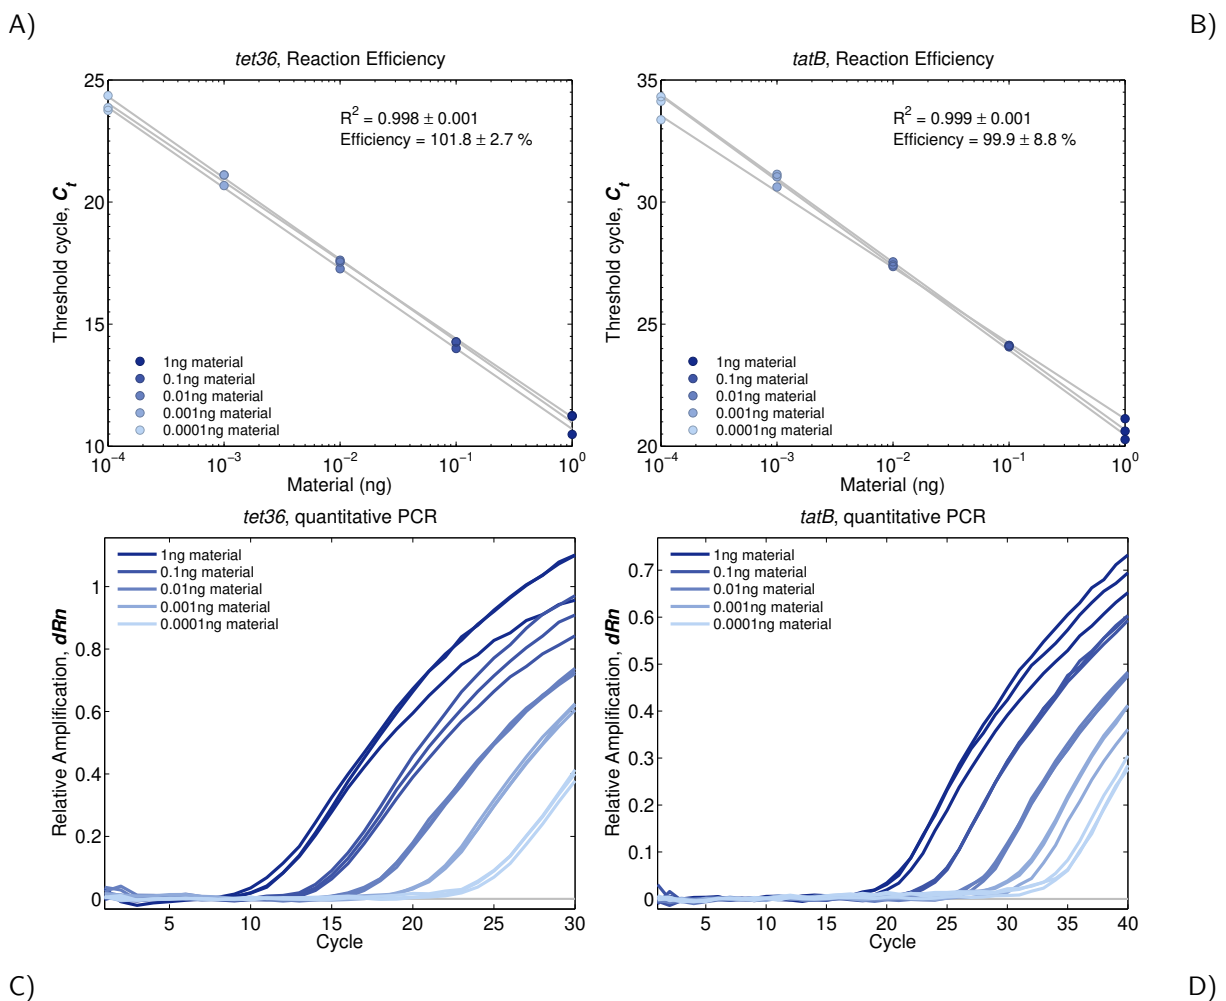

424 **FIGURE S7. Quantitative PCR calibration curves for *tet(36)* and *tatB*.** Reaction efficiency  
 425 for the set of primers and probes listed in the ‘methods’ section for *tet(36)* (A) and *tatB*. The efficiency  
 426 was calculated as  $E_f = 10^{-1/Slope} - 1$ , and the slope term calculated by fitting a linear model to qPCR  
 427 threshold cycle ( $C_t$ ) data. The mean  $\pm$  standard deviation for the coefficient of determination  $R^2$  and  
 428 efficiency are shown in the figures. The amplification curves for each reaction are shown in C) and D),  
 429 respectively.
